# Supplementary material for: A Direct-to-Public Peer Support Program (Big White Wall) Versus Web-Based Information to Aid the Self-management of Depression and Anxiety: Results and Challenges of an Automated Randomized Controlled Trial
Source: PubMed Central journal article supplement (PMC8105759; doi:10.2196/23487), 2021-04-23
Supplement: jmir_v23i4e23487_app2.pdf [file jmir_v23i4e23487_app2.pdf]

**Supplementary materials**

**Figure S1 Trifold leaflet (uploaded separately as a PDF)**

**Table S1. Unit costs, productivity resources, and disease prevalences.**

| Service                                           | Unit cost (£) |               | Source                                                                                                |
|---------------------------------------------------|---------------|---------------|-------------------------------------------------------------------------------------------------------|
| <b>Inpatient (per admittance)</b>                 |               |               |                                                                                                       |
| Non elective inpatient                            | 3117.75       |               |                                                                                                       |
| <b>Outpatient (per visit)</b>                     |               |               |                                                                                                       |
| Accident and emergency                            | 160.32        |               | NHS Reference costs 2017/18 <sup>1</sup>                                                              |
| Radiology                                         | 145.63        |               |                                                                                                       |
| Physiotherapist                                   | 54.91         |               |                                                                                                       |
| Occupational therapist                            | 73.25         |               |                                                                                                       |
| Psychiatrist                                      | 353.05        |               |                                                                                                       |
| <b>Primary and community (per contact minute)</b> |               |               |                                                                                                       |
| General practitioner                              | 3.4           |               | PSSRU unit costs of health and social care 2018 <sup>2</sup>                                          |
| GP home visit (excluding travel)                  | 3.4           |               |                                                                                                       |
| Practical nurse                                   | 0.6           |               |                                                                                                       |
| Psychologist                                      | 1.47          |               |                                                                                                       |
| Psychiatric nurse                                 | 1.23          |               |                                                                                                       |
| Occupational therapist                            | 0.72          |               |                                                                                                       |
| Social worker                                     | 0.73          |               |                                                                                                       |
| Out-of-hours care (per contact)                   | 76.02         |               |                                                                                                       |
| Walk-in centre (per contact)                      | 76.02         |               |                                                                                                       |
| <b>Median team production multiplier</b>          | 1.28          |               | Nicholson et al. (2006) <sup>4</sup>                                                                  |
| <b>Median weekly pay - gross (£)</b>              |               |               |                                                                                                       |
|                                                   | <b>Male</b>   | <b>Female</b> | Annual survey of hours and earnings, Office for National Statistics (2018) <sup>5</sup>               |
| Full-time                                         | 621.18        | 519.28        |                                                                                                       |
| Part-time                                         | 180.85        | 193.70        |                                                                                                       |
| <b>Disease specific prevalence (%) 16-64</b>      | 5.8           | 9.48          | Adult Psychiatric and Morbidity Survey, NHS Digital (2014) <sup>6</sup>                               |
| <b>Labour market activity (thousands) 16-64</b>   | 16326         | 14755         | Labour market statistics time series - April 2019, Office for National Statistics (2019) <sup>7</sup> |
| <b>Working age population (thousands) 16-64</b>   | 20773         | 20873         | Population estimates - mid-2018, Office for National Statistics (2019) <sup>8</sup>                   |

IAPT cost used as primary outpatient referral pathway for anxiety and depression, incurs an initial fixed assessment cost of £121.08. Excludes qualification costs. Psychiatric nurses were costed as a band 6 community nurse. The cost-per-case, national average cost, for opted-out services was £68.30 2013 -> £76.02 in 2018 adjusted for inflation of 11.31% from ONS consumer price index. No individual costing information for walk-in centres was able to be located, this absence of literature was remarked by NICE<sup>9</sup>, the sole evidence a comparative study which estimated a fixed cost of £76.54. Out-of- hours care costs were assumed a suitable proxy given the similarity between estimates and that walk-in centres were considered as a form of out-of-hours care<sup>10</sup>. Median salaries were adjusted for inflation (2%) using the change in consumer price index from June 2018 to June 2019<sup>11</sup>.

## References

1. NHS Improvement. NHS Reference Costs. 2018. <https://improvement.nhs.uk/resources/reference-costs/>
2. Curtis, L. & Burns, A. Unit Costs of Health and Social Care 2018, Personal Social Services Research Unit, University of Kent, Canterbury. 2018. <https://doi.org/10.22024/UniKent/01.02.70995>
3. National Audit Office. Out-of-hours GP services in England. 2014. <https://www.nao.org.uk/wp-content/uploads/2014/09/Out-of-hours-GP-services-in-England1.pdf>
4. Nicholson S, Pauly MV, Polsky D, Sharda C, Szrek H, Berger ML. Measuring the effects of work loss on productivity with team production. *Health Econ.* 2006. Feb;15(2):111-23. PubMed PMID: 16200550.

5. Office for National Statistics . Dataset: Earnings and hours worked, all employees: ASHE Table 1. 2018.  
<https://www.ons.gov.uk/employmentandlabourmarket/peopleinwork/earningsandworkinghours/datasets/allemployeesashtable1>
6. Health and Social Care Information Centre. Adult psychiatric and morbidity survey. 2014.  
<https://digital.nhs.uk/data-and-information/publications/statistical/adult-psychiatric-morbidity-survey/adult-psychiatric-morbidity-survey-of-mental-health-and-wellbeing-england-2014>
7. Office for National Statistics. Dataset: Labour market statistics time series. 2019.  
<https://www.ons.gov.uk/employmentandlabourmarket/peopleinwork/employmentandemployeetypes/datasets/labourmarketstatistics>.
8. Office for National Statistics. Dataset: Estimates of the population for the UK, England and Wales, Scotland and Northern Ireland. 2019.  
<https://www.ons.gov.uk/peoplepopulationandcommunity/populationandmigration/populationestimates/datasets/populationestimatesforukenglandandwalesscotlandandnorthernireland>
9. National Institute for Health and Care Excellence (2018). Chapter 18 Minor injury unit, urgent care centre or walk-in centre. <https://www.nice.org.uk/guidance/ng94/evidence/18.minor-injury-unit-urgent-care-centre-or-walkin-centre-pdf-172397464605>
10. Salisbury et al. The Impact of co-located NHS walk-in centres on emergency departments. *Emerg Med Journal* 2007;24:265-269.
11. Office for National Statistics . Dataset: Consumer price inflation tables. 2019.  
<https://www.ons.gov.uk/economy/inflationandpriceindices/datasets/consumerpriceinflation>

**Table S2. Summary of Engagement by researchers to recruit groups and services to help disseminate the study.**

| <b>Adopter Type</b>                     | <b>Number contacted</b>                                |
|-----------------------------------------|--------------------------------------------------------|
| Library                                 | 57                                                     |
| CityCare Teams                          | 21                                                     |
| Allied Health Care Teams                | 39                                                     |
| Primary Schools (Staff and Parents)     | 248                                                    |
| Secondary Schools (staff and Parents)   | 65                                                     |
| Gyms                                    | 119                                                    |
| University Departments                  | 119                                                    |
| Nurseries                               | 151                                                    |
| Community Centres                       | 183                                                    |
| Employers                               | 219                                                    |
| Supermarkets                            | 226                                                    |
| Foodbanks                               | 31                                                     |
| Pharmacies                              | 267                                                    |
| GP and Primary care Practices           | 175                                                    |
| Secondary Care Practices                | 42                                                     |
| Opinion Formers (e.g. CCGs)             | 12                                                     |
| Religious Organisations                 | 18                                                     |
| Rural Organisations (e.g Young Farmers) | 3                                                      |
| Third sector                            | 79                                                     |
| Voluntary Organisations                 | 76                                                     |
| General Marketing Campaign              |                                                        |
| Door Drops and Leafleting               | 100k over the course of the study (2 x 10k door drops) |
| Facebook Advertising (Nativve)          | 3 x 1 month                                            |
| Tram Advertising                        | 1 x 8 weeks 1 x 4 weeks                                |
| Bus Advertising                         | 2 x 4 weeks                                            |
| Radio Interviews                        | 2 x BBC Local Radio                                    |

**Figures S2. Spread of randomised participants based on postcodes given.**

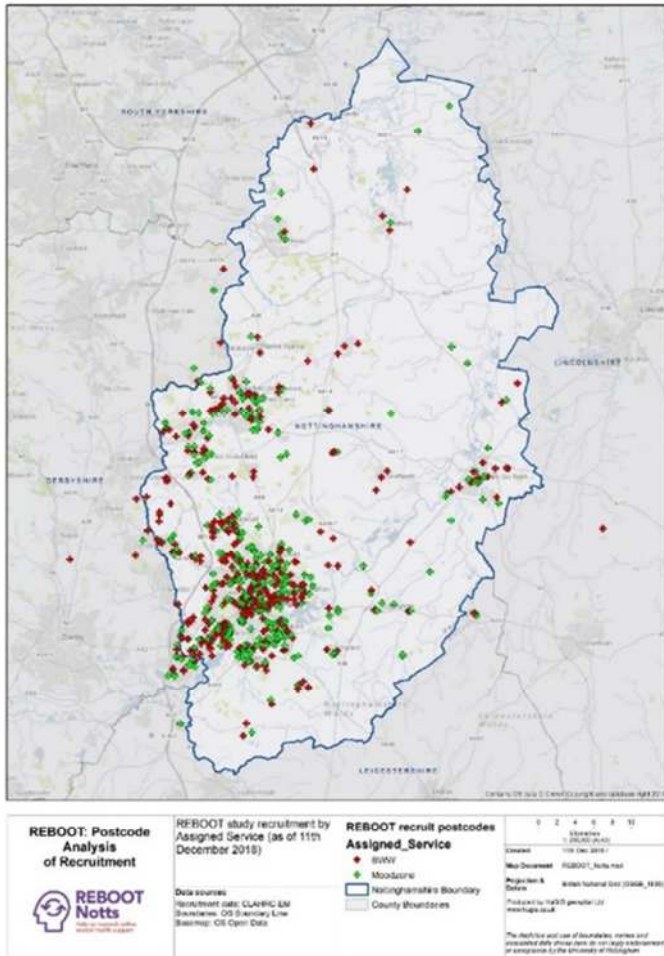

**Figure S3 Spread of randomised participants recruited through Tram advertising (tram route in red).**

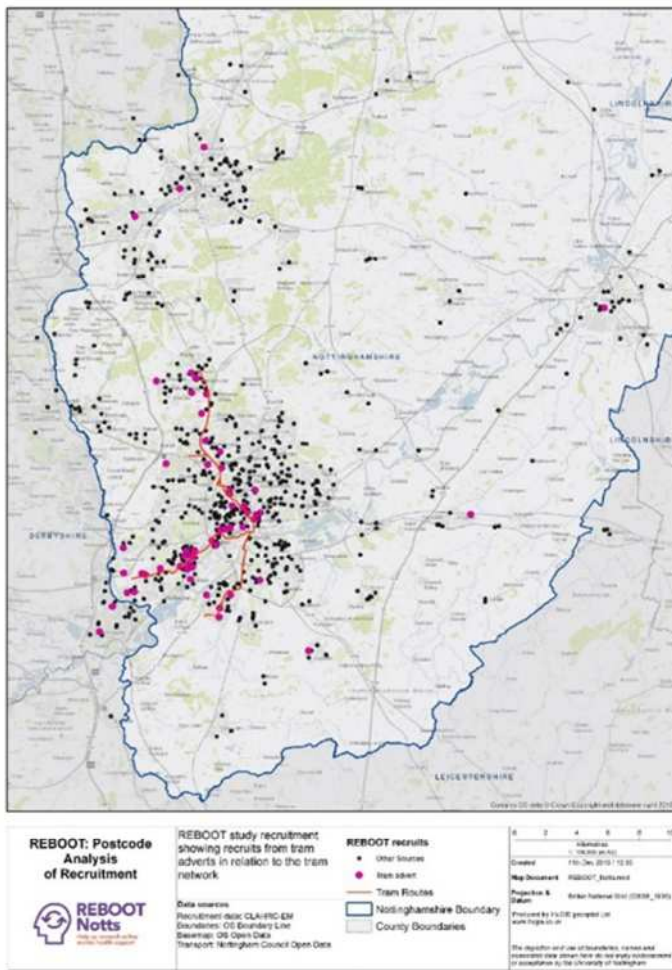

**Table S3. Baseline self-reported intensity of service use at point of access within last three months.**

| Service                      | Arm 1 (n=397) |             |               | Arm 2 (n=393) |             |               |
|------------------------------|---------------|-------------|---------------|---------------|-------------|---------------|
|                              | n/N           | Admissions  | Bed days      | n/N           | Admissions  | Bed days      |
| <b>Inpatient</b>             |               |             |               |               |             |               |
| General medical ward         | 7/7           | 1 (0)       | 5.5 (6.35)    | 8/8           | 1.5 (1.07)  | 5.86 (7.1)    |
| Acute psychiatric ward       | 0/2           | -           | -             | 0/0           | -           | -             |
| <b>Outpatient</b>            |               | Visits      |               |               | Visits      |               |
| A&E                          | 20/20         | 1.35 (0.81) | -             | 18/18         | 1.7 (1.13)  | -             |
| Radiology                    | 17/17         | 1.29 (0.69) | -             | 19/19         | 1.37 (0.6)  | -             |
| Physiotherapist              | 17/17         | 3.47 (3)    | -             | 13/13         | 2.92 (1.7)  | -             |
| Occupational therapist       | 6/6           | 3.17 (4.4)  | -             | 6/6           | 3.5 (3.51)  | -             |
| Psychiatrist                 | 15/15         | 3.87 (4.19) | -             | 13/13         | 3.7 (4.77)  | -             |
| <b>Primary and community</b> |               | Contacts    | Minutes       |               | Contacts    | Minutes       |
| General practitioner         | 111/113       | 2.6 (1.64)  | 11.46 (4.9)   | 115/115       | 2.88 (2.09) | 13.28 (10.68) |
| GP home visit                | 2/2           | 3.5 (3.55)  | 10 (0)        | 2/2           | 2.5 (0.71)  | 8.5 (9.19)    |
| Practical nurse              | 31/31         | 1.55 (1.06) | 11.1 (6.16)   | 38/38         | 1.95 (2.08) | 12.92 (10.55) |
| Psychologist                 | 5/6           | 5.8 (4.49)  | 44.33 (22.06) | 3/3           | 8.67 (5.69) | 46.67 (23.09) |
| Psychiatric Nurse            | 4/4           | 1.75 (0.98) | 30 (0)        | 5/5           | 5.6 (5.86)  | 52.5 (15)     |
| Occupational Therapist       | 2/2           | 4.5 (2.12)  | 82.5 (53.03)  | 6/6           | 1.33 (0.52) | 40.83 (33.97) |
| Out-of-hours care            | 4/4           | 1.75 (1.5)  | 20.75 (12.74) | 5/5           | 1.6 (0.55)  | 12.25 (6.85)  |
| Walk-in centre               | 5/5           | 1.2 (0.48)  | 74 (78.21)    | 10/10         | 1.2 (0.42)  | 87.67 (96.6)  |
| Social worker                | 1/1           | 3 (-)       | 60 (-)        | 2/2           | 2 (0)       | 120 (84.85)   |
